# Supplementary material for: Alternative NADH dehydrogenase extends lifespan and increases resistance to xenobiotics in Drosophila
Source: PubMed Central journal article supplement (PMC7056681; doi:10.1007/s10522-019-09849-8), 2019-11-20
Supplement: 10522_2019_9849_MOESM1_ESM.pdf [file 10522_2019_9849_MOESM1_ESM.pdf]

**Supplementary material of**  
**Alternative NADH dehydrogenase extends lifespan**  
**and increases resistance to xenobiotics in *Drosophila***

**Dmytro V. Gospodaryov<sup>1</sup>, Olha M. Strilbytska<sup>1</sup>, Uliana V. Semaniuk<sup>1</sup>,  
Natalia V. Perkhulyn<sup>1</sup>, Bohdana M. Rovenko<sup>1\*</sup>, Ihor S. Yurkevych<sup>1</sup>,  
Ana G. Barata<sup>2</sup>, Tobias P. Dick<sup>2</sup>, Oleh V. Lushchak<sup>1</sup>, Howard T. Jacobs<sup>3</sup>**

<sup>1</sup>Department of Biochemistry and Biotechnology, Vasyl Stefanyk Precarpathian National University, Ivano-Frankivsk, Ukraine

<sup>2</sup>Division of Redox Regulation, DKFZ-ZMBH Alliance, German Cancer Research Center (DKFZ), Heidelberg, Germany

<sup>3</sup>Faculty of Medicine and Health Technology, Tampere University, Tampere, Finland

\*Present address: Department of Biosciences, Institute of Biotechnology, University of Helsinki, Helsinki, Finland

Address correspondence to: Dmytro V. Gospodaryov, Department of Biochemistry and Biotechnology, Faculty of Natural Sciences, Vasyl Stefanyk Precarpathian National University, 57 Shevchenko Str., Ivano-Frankivsk, 76018, Ukraine. E-mail: dmytro.hospodarov@pu.if.ua

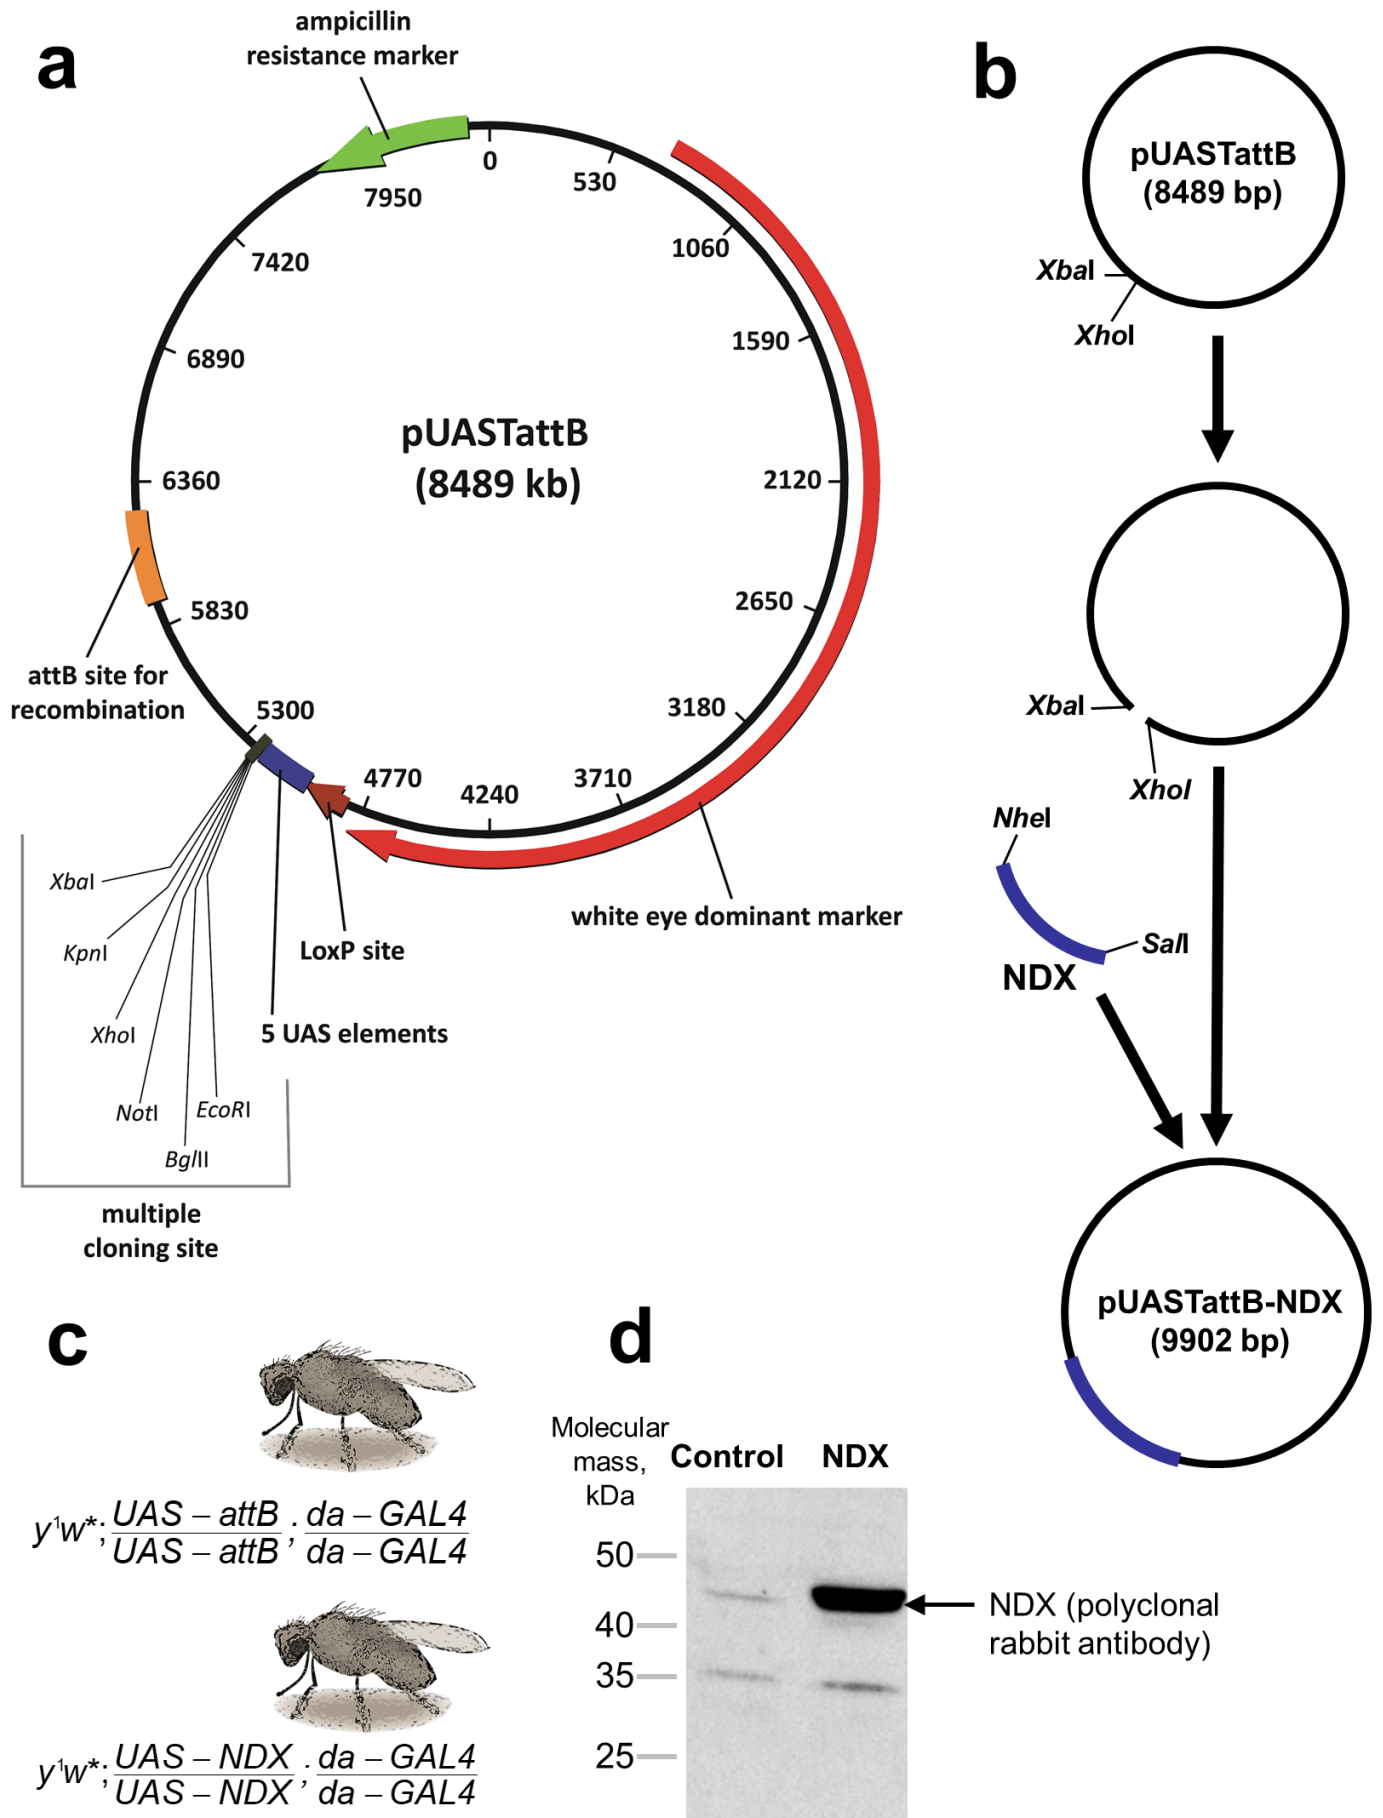

**Fig. S1** Information on cloning strategy, fruit fly genotypes and confirmation of NDX expression in individuals of fruit fly lines used in the study (Gospodaryov et al. 2014). **a** Architecture of the cloning vector pUASTattB used for cloning NDX. **b** Strategy of NDX cloning. **c** Genotypes of control (top) and NDX-expressing lines (bottom). **d** Western blot confirming expression of NDX

**Table S1** Prediction of NDX localization and its mitochondrial targeting sequence by different software

| Software     | Cleavage site | Score(% probability) | Organelle | Reference                                                                                                                       |
|--------------|---------------|----------------------|-----------|---------------------------------------------------------------------------------------------------------------------------------|
| MitoProt II  | 49 50         | 82.6                 | M         | <a href="http://ihg.gsf.de/ihg/mitoprot.html">http://ihg.gsf.de/ihg/mitoprot.html</a>                                           |
| Targetp v1.1 | 24 25         | 29.2                 | M         | <a href="http://www.cbs.dtu.dk/services/TargetP/">http://www.cbs.dtu.dk/services/TargetP/</a>                                   |
| PSORT II:    | –             | 43.5                 | M         | <a href="http://psort.hgc.jp/form2.html">http://psort.hgc.jp/form2.html</a>                                                     |
| GvH          | 19 20         | –                    |           |                                                                                                                                 |
| Gavel        | 41 42         | –                    |           |                                                                                                                                 |
| WoLFPSORT    | –             | 25.5                 | M         | <a href="http://wolfpsort.seq.cbrc.jp/">http://wolfpsort.seq.cbrc.jp/</a>                                                       |
| iPSORT       | 29 30         |                      | M         | <a href="http://ipsort.hgc.jp/">http://ipsort.hgc.jp/</a>                                                                       |
| YLoc         | –             | 97.3                 | M         | <a href="http://abi.inf.uni-tuebingen.de/Services/YLoc/webloc.cgi">http://abi.inf.uni-tuebingen.de/Services/YLoc/webloc.cgi</a> |
| CELLO        | –             | –                    | M         | <a href="http://cello.life.nctu.edu.tw/">http://cello.life.nctu.edu.tw/</a>                                                     |
| Predotar     | –             | 54.0                 | M         | <a href="https://urgi.versailles.inra.fr/predotar/predotar.html">https://urgi.versailles.inra.fr/predotar/predotar.html</a>     |
| SherLoc      | –             | 68.0                 | M         | <a href="http://abi.inf.uni-tuebingen.de/Services/SherLoc/">http://abi.inf.uni-tuebingen.de/Services/SherLoc/</a>               |

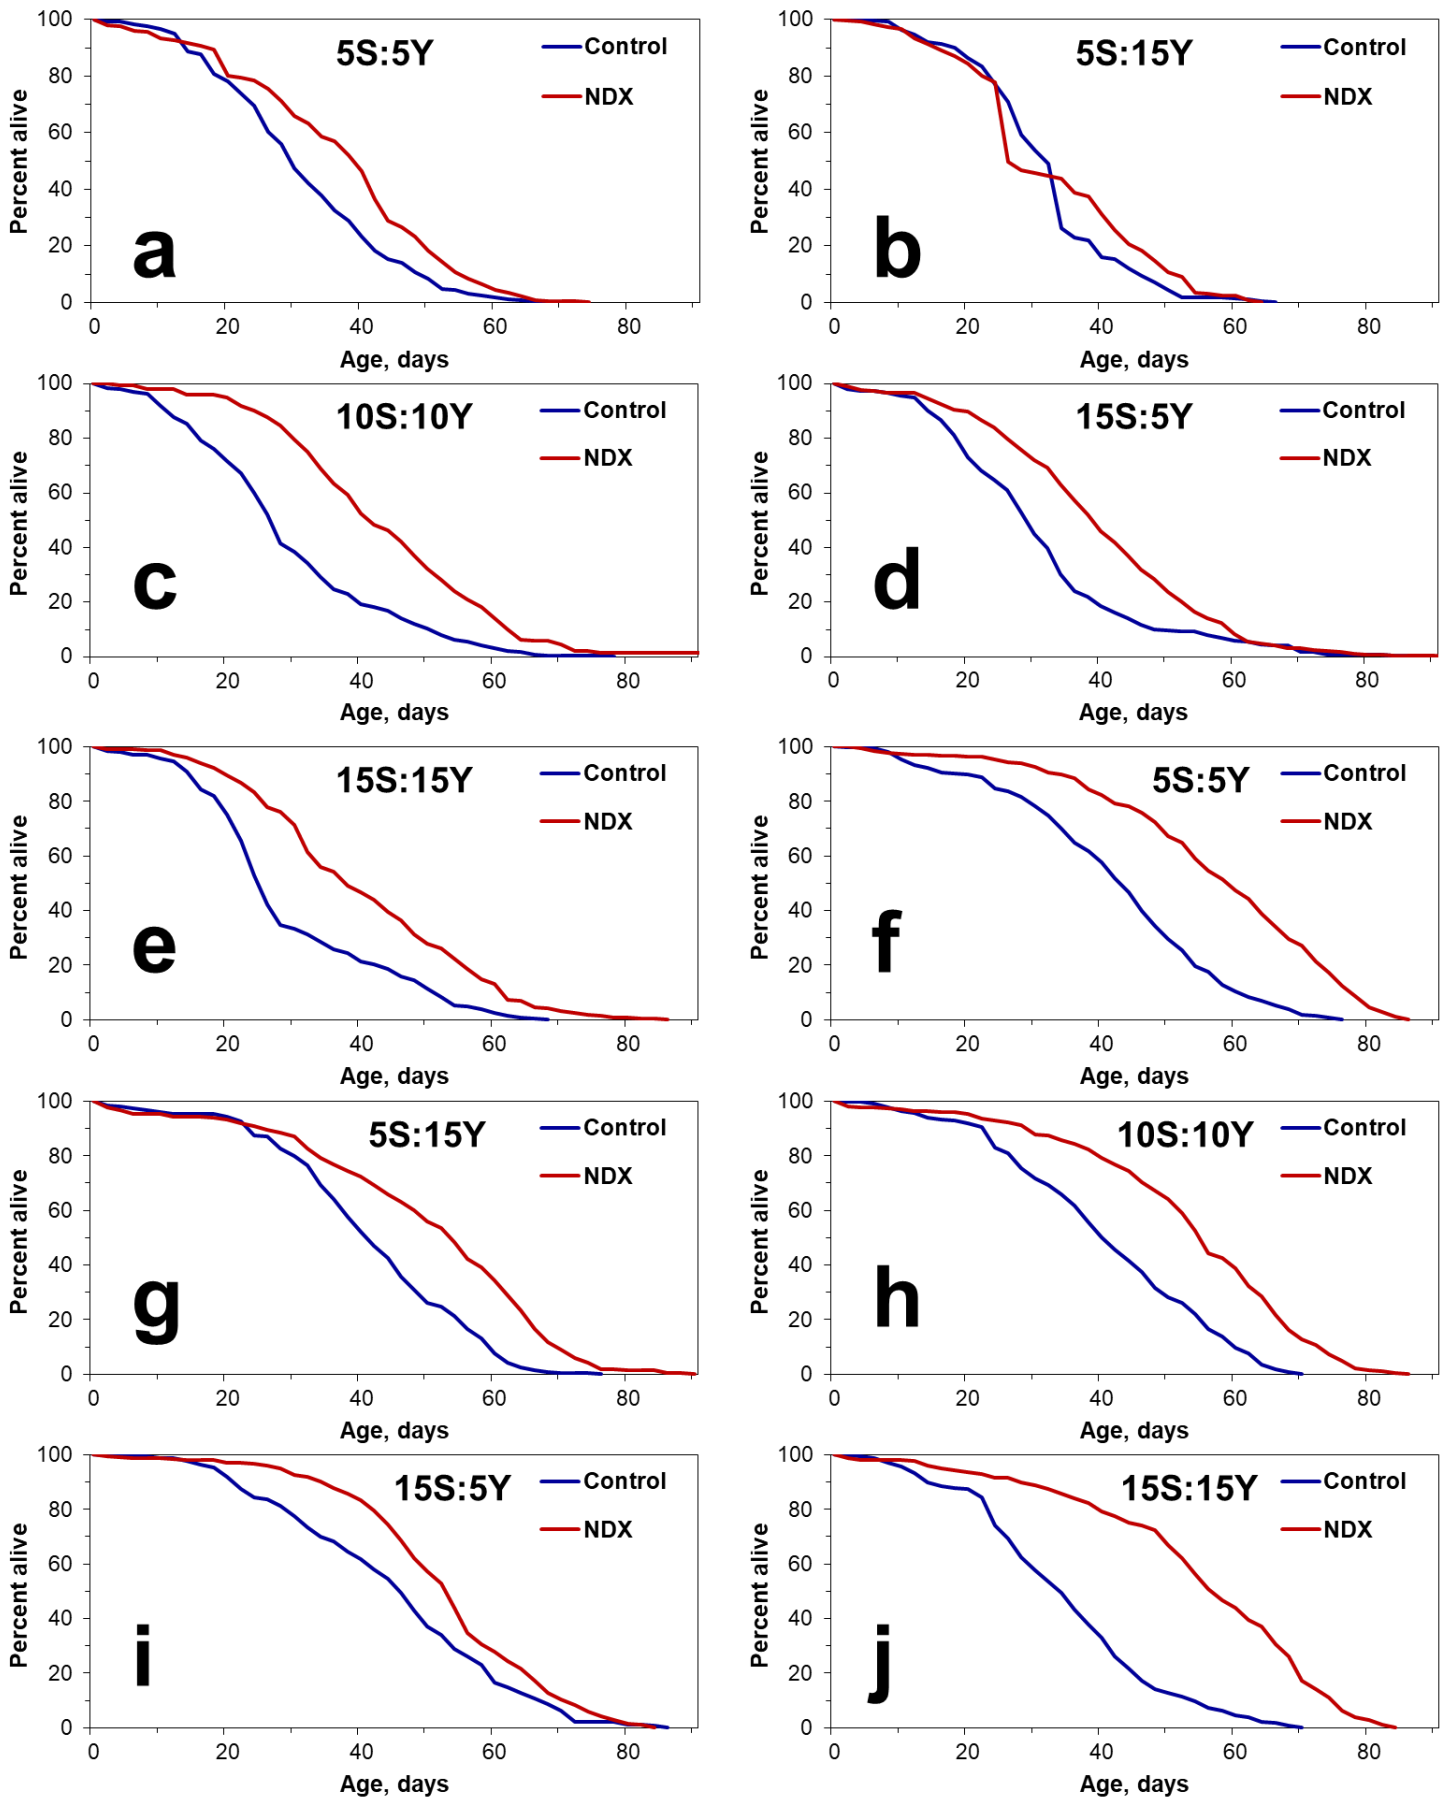

**Fig. S2** Lifespan curves of the control ('Control') and NDX-expressing ('NDX') *Drosophila melanogaster* on the diets containing sucrose (S) and yeast (Y). The percentages of dietary components are shown inside plots. From 221 to 302 individuals were used per line and diet. Panels **a-e** are lifespans for male cohorts, panels **f-j** are for female cohorts.

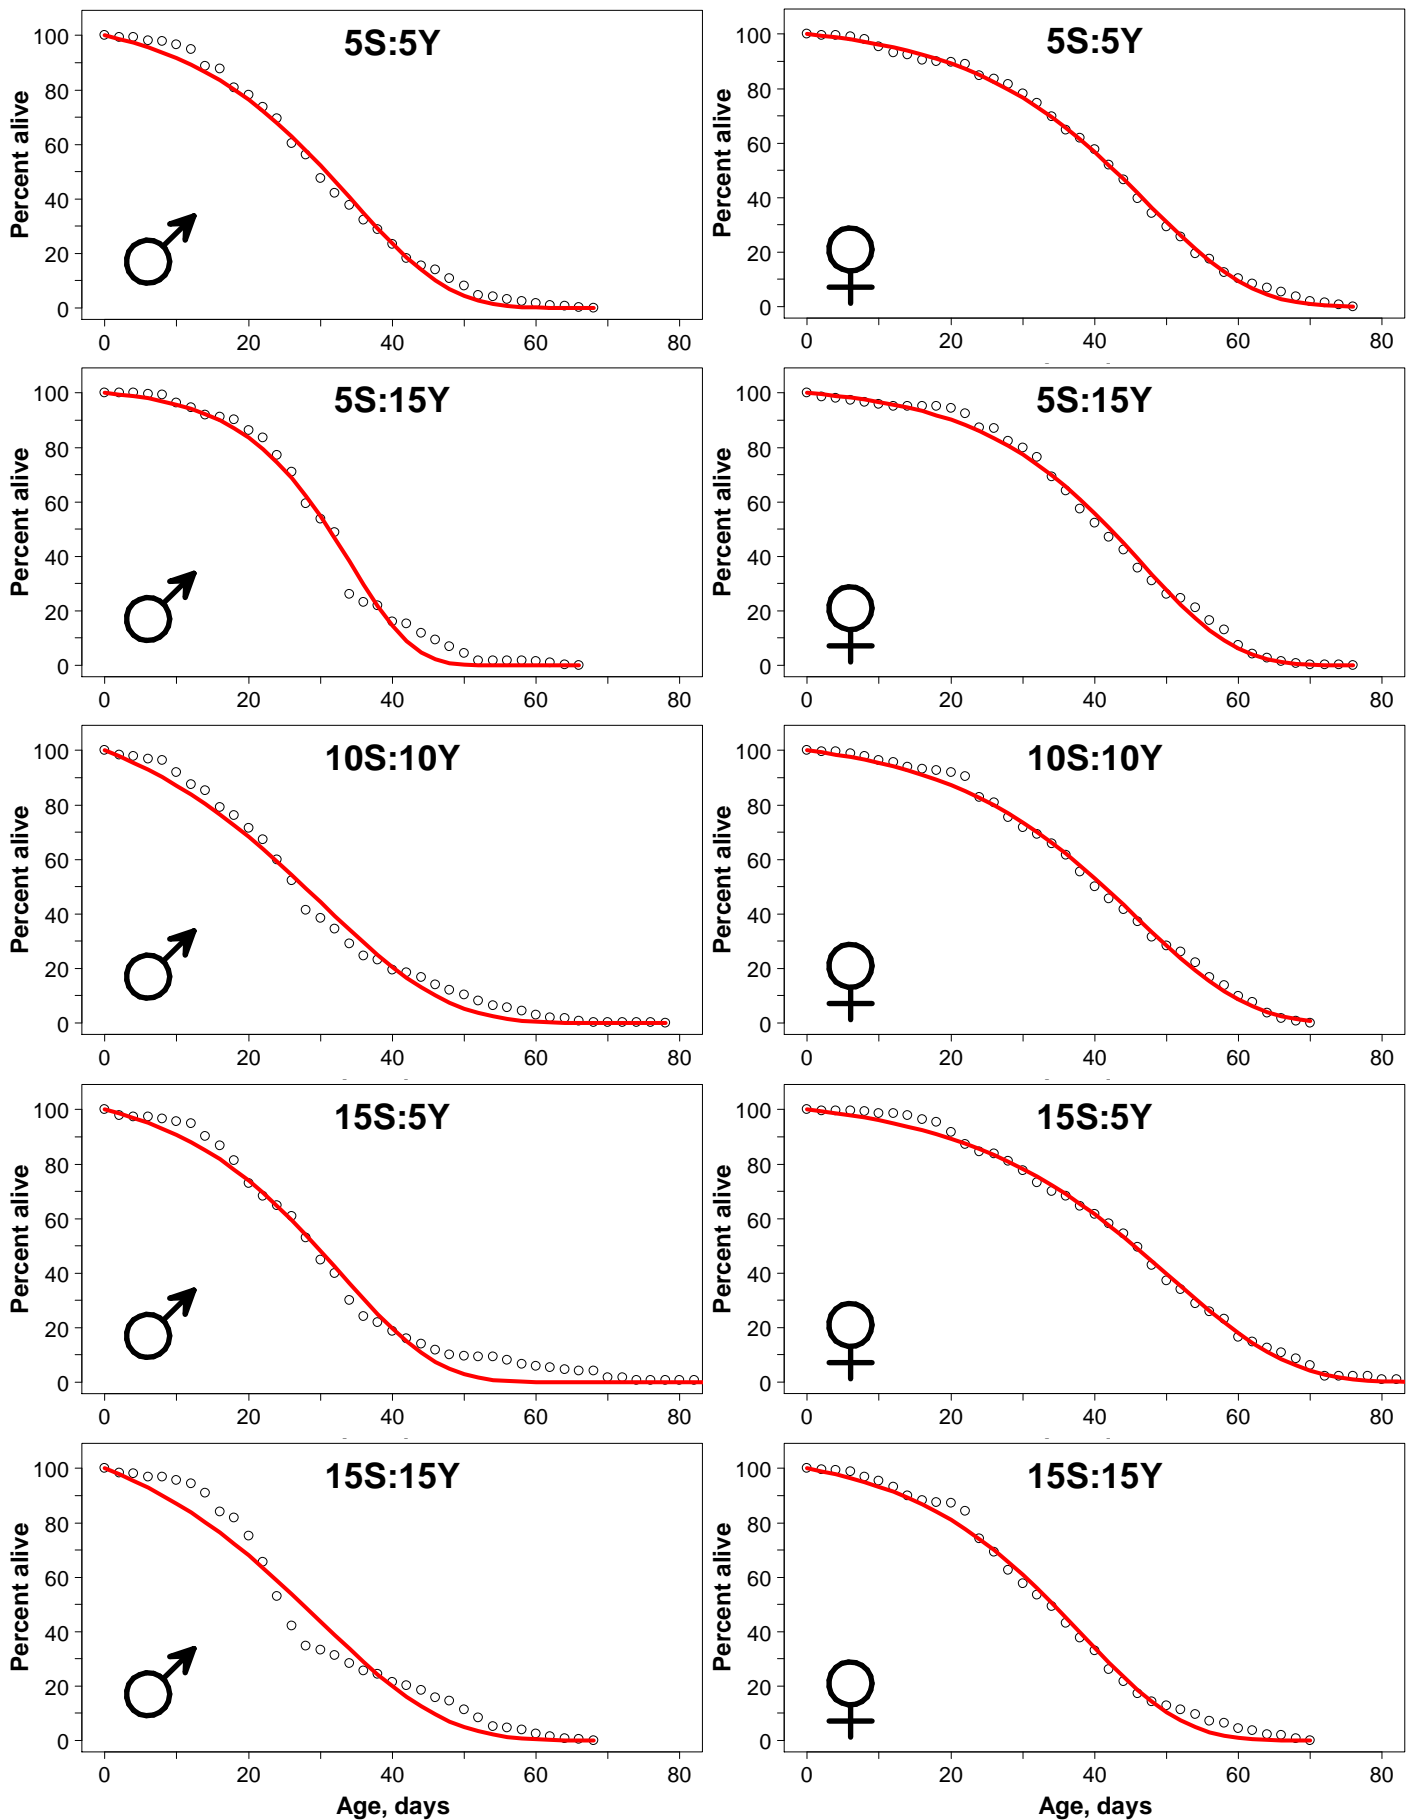

**Fig. S3** Approximation (red lines) of lifespan curves for the control line on different diets by modified Gompertz equation  $N_t = N_0 \cdot \exp\{A \cdot (1 - \exp(\alpha t)) / \alpha t\}$  where  $N_t$  is the number of alive individuals at any time moment,  $N_0$  is an initial cohort size, and  $A$  and  $\alpha$  are age-independent and age-dependent parameters of Gompertz equation, respectively

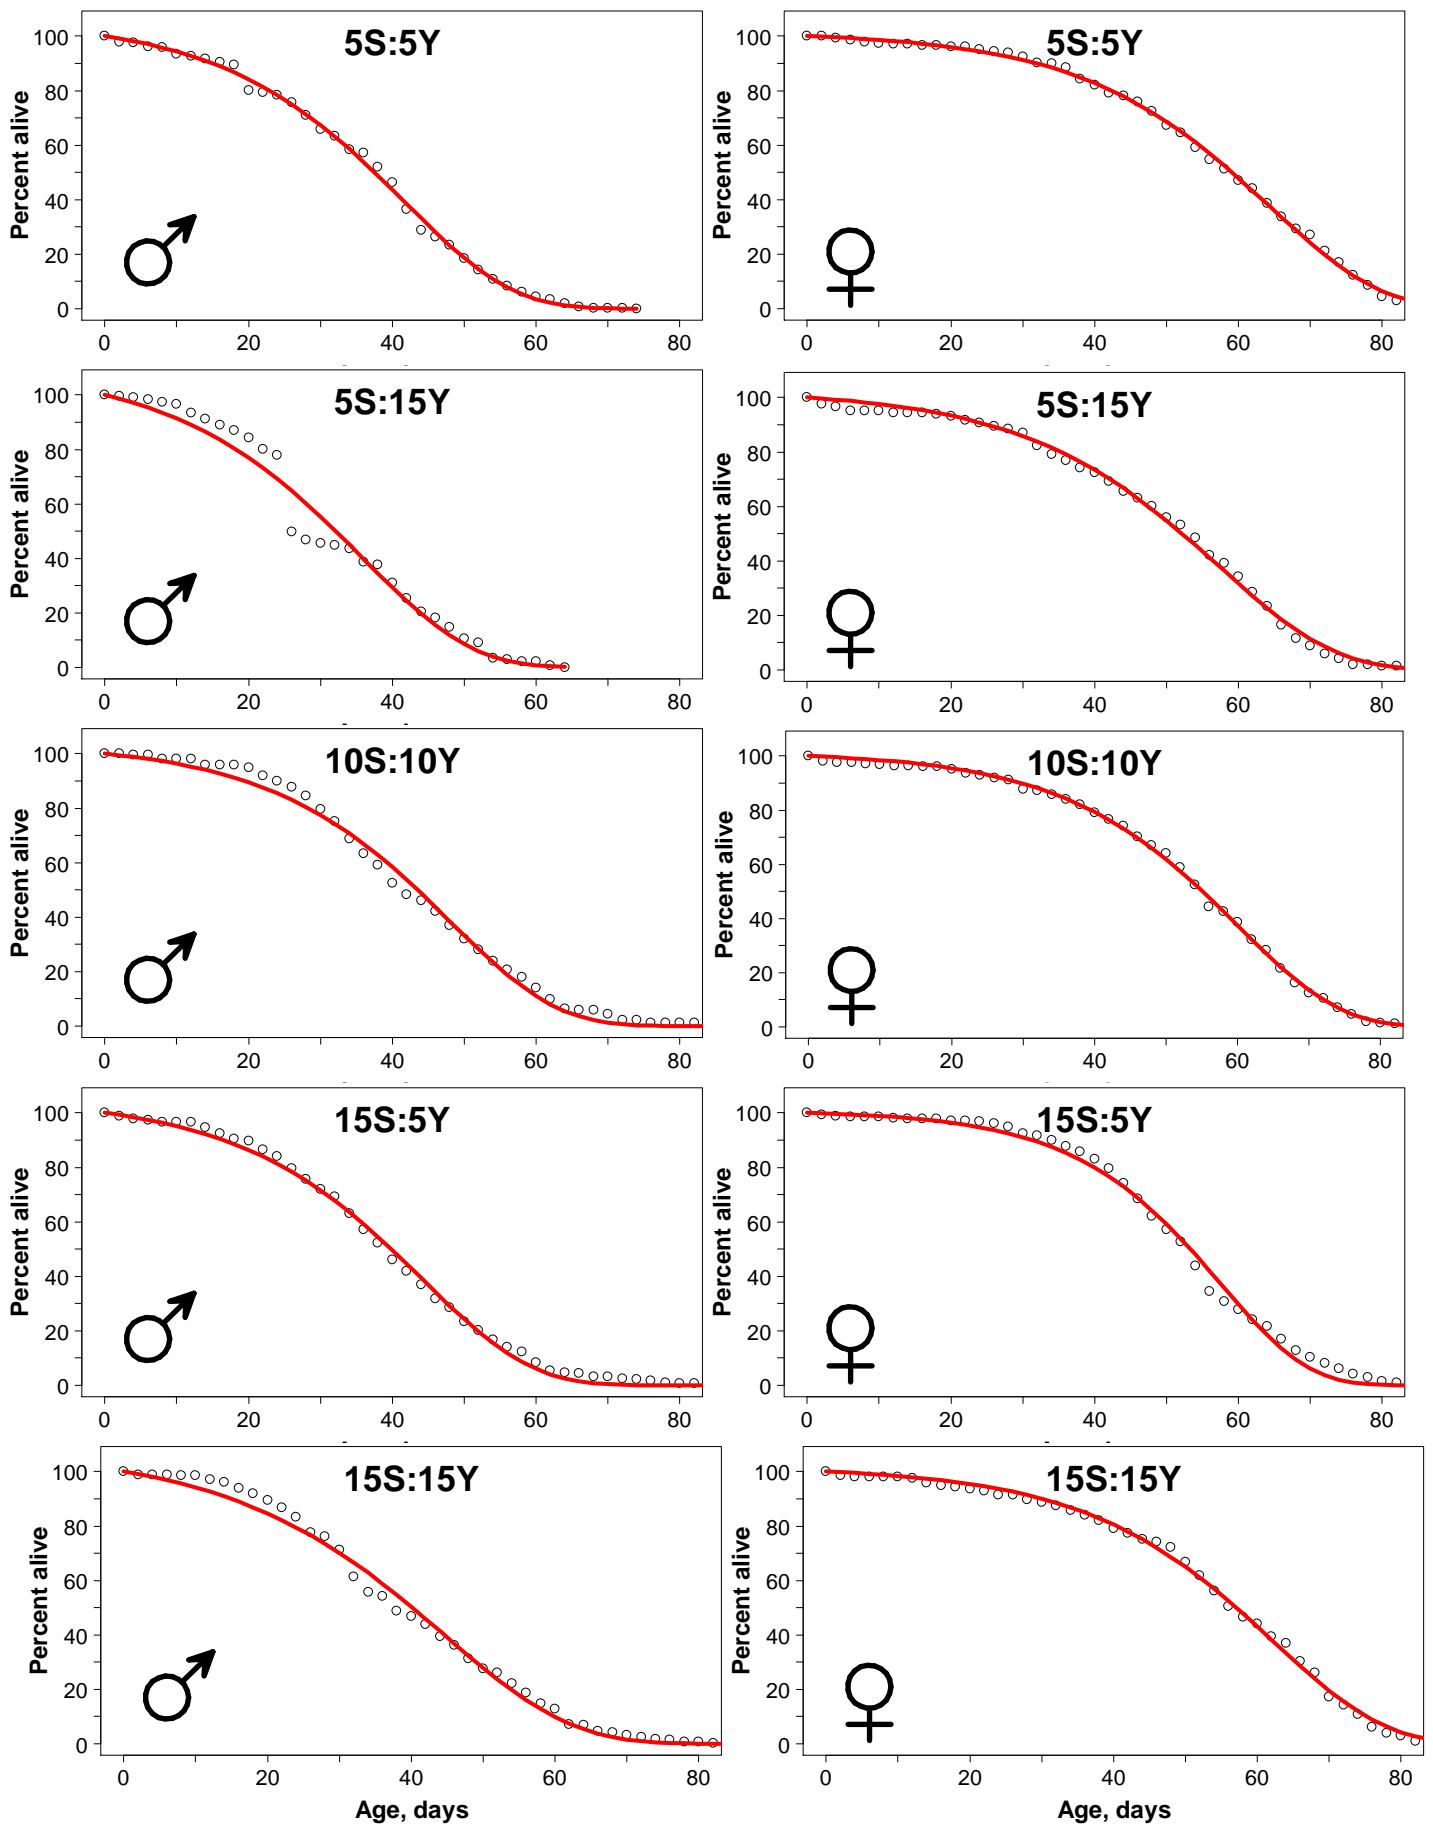

**Fig. S4** Approximation (red lines) of lifespan curves for the NDX-expressing line on different diets by modified Gompertz equation  $N_t = N_0 \cdot \exp\{A \cdot (1 - \exp(\alpha t)) / \alpha t\}$  where  $N_t$  is the number of alive individuals at any time moment,  $N_0$  is an initial cohort size, and  $A$  and  $\alpha$  are age-independent and age-dependent parameters of Gompertz equation, respectively

**Table S2** Four-way analysis of variance of resistance of control and NDX-expressing flies to different concentrations of sodium chromate, using following factors: fruit fly line, age, sex, and salt concentration

| Factor                     | Degrees of freedom | Sum of Squares | Mean Square | <i>F</i> -value | <i>p</i> -value | Significance of the main effect or interaction |
|----------------------------|--------------------|----------------|-------------|-----------------|-----------------|------------------------------------------------|
| Line                       | 1                  | 9241           | 9241        | 140.22          | 0.0000000       | ***                                            |
| Age                        | 2                  | 24068          | 12034       | 182.599         | 0.0000000       | ***                                            |
| Sex                        | 1                  | 55198          | 55198       | 837.563         | 0.0000000       | ***                                            |
| Concentration              | 2                  | 58713          | 29356       | 445.446         | 0.0000000       | ***                                            |
| Line×Age                   | 2                  | 683            | 342         | 5.185           | 0.0067330       | **                                             |
| Line×Sex                   | 1                  | 410            | 410         | 6.227           | 0.0137510       | *                                              |
| Age×Sex                    | 2                  | 1939           | 970         | 14.711          | 0.0000016       | ***                                            |
| Line×Concentration         | 2                  | 1112           | 556         | 8.439           | 0.0003470       | ***                                            |
| Age×Concentration          | 4                  | 2807           | 702         | 10.648          | 0.0000001       | ***                                            |
| Sex×Concentration          | 2                  | 3507           | 1753        | 26.607          | 0.0000000       | ***                                            |
| Line×Age×Sex               | 2                  | 493            | 246         | 3.738           | 0.0262300       | *                                              |
| Line×Age×Concentration     | 4                  | 92             | 23          | 0.349           | 0.8445880       |                                                |
| Line×Sex×Concentration     | 2                  | 3              | 1           | 0.02            | 0.9805350       |                                                |
| Age×Sex×Concentration      | 4                  | 744            | 186         | 2.821           | 0.0273980       | *                                              |
| Line×Age×Sex×Concentration | 4                  | 335            | 84          | 1.271           | 0.2843250       |                                                |
| Residuals                  | 139                | 9161           | 66          |                 |                 |                                                |

**Table S3** Four-way analysis of variance of resistance of control and NDX-expressing flies to different concentrations of sodium molybdate, using the same factors as in Table S2

| Factor                     | Degrees of freedom | Sum of Squares | Mean Square | <i>F</i> -value | <i>p</i> -value | Significance of the main effect or interaction |
|----------------------------|--------------------|----------------|-------------|-----------------|-----------------|------------------------------------------------|
| Line                       | 1                  | 43269          | 43269       | 109.243         | 0.0000000       | ***                                            |
| Age                        | 2                  | 505            | 253         | 0.638           | 0.5298900       |                                                |
| Sex                        | 1                  | 130714         | 130714      | 330.019         | 0.0000000       | ***                                            |
| Concentration              | 2                  | 1346614        | 673307      | 1699.923        | 0.0000000       | ***                                            |
| Line×Age                   | 2                  | 8837           | 4418        | 11.155          | 0.0000292       | ***                                            |
| Line×Sex                   | 1                  | 764            | 764         | 1.93            | 0.1666800       |                                                |
| Age×Sex                    | 2                  | 155            | 77          | 0.195           | 0.8228600       |                                                |
| Line×Concentration         | 2                  | 51718          | 25859       | 65.287          | 0.0000000       | ***                                            |
| Age×Concentration          | 4                  | 3988           | 997         | 2.517           | 0.0434600       | *                                              |
| Sex×Concentration          | 2                  | 56695          | 28347       | 71.57           | 0.0000000       | ***                                            |
| Line×Age×Sex               | 2                  | 2924           | 1462        | 3.691           | 0.0270900       | *                                              |
| Line×Age×Concentration     | 4                  | 30569          | 7642        | 19.294          | 0.0000000       | ***                                            |
| Line×Sex×Concentration     | 2                  | 4406           | 2203        | 5.562           | 0.0046200       | **                                             |
| Age×Sex×Concentration      | 4                  | 2206           | 552         | 1.393           | 0.2388600       |                                                |
| Line×Age×Sex×Concentration | 4                  | 2918           | 730         | 1.842           | 0.1233800       |                                                |
| Residuals                  | 160                | 63373          | 396         |                 |                 |                                                |
